# Supplementary material for: Genomics and the future of conservation genetics
Source: Springer Nature journal article supplement (doi:10.1038/nrg2844), 2010-09-17
Supplement: 41576_2010_BFnrg2844_MOESM264_ESM.pdf [file 41576_2010_BFnrg2844_MOESM264_ESM.pdf]

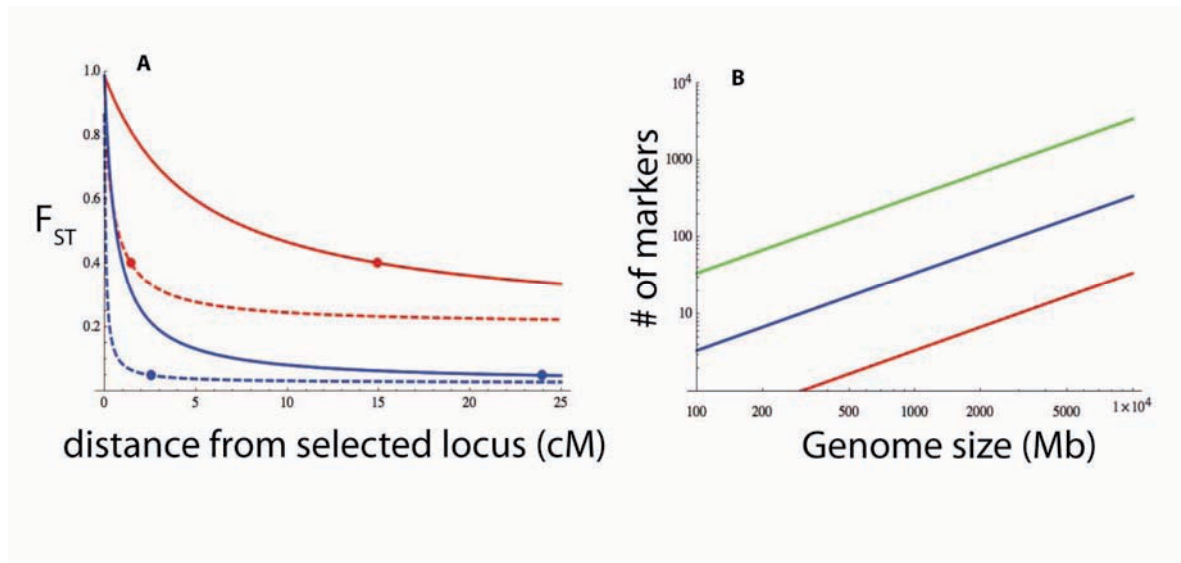

**Figure S1 | The ability to detect local adaptation depends on gametic disequilibrium between the genotyped markers and loci under selection.** **A** |  $F_{ST}$  at linked sites declines with distance from the locus under selection. Plotted are expected  $F_{ST}$  values in a symmetrical two-island model with selection on alternative alleles at a single locus, based on coalescent approximations<sup>1</sup>, for two levels of migration (red,  $Nm = 0.5$ ; blue,  $Nm = 5.0$ ) and selection (solid,  $s = 0.50$ ; dashed,  $s = 0.05$ ). Filled circles on each curve represent the point at which  $F_{ST}$  is twice the expected background (neutral) level. **B** | Number of markers needed to reach an expectation of one marker within the region of elevated  $F_{ST}$  for the low-migration, strong-selection case in part A, across a range of genome sizes. This depends on the average levels of gametic disequilibrium across the genome, which are in turn determined by recombination rate (green, 10 cM/Mb; blue, 1 cM/Mb; red, 0.1 cM/Mb) and other factors. In practice, recombination rates and the scale of GD vary widely across the genome, and the power to detect  $F_{ST}$  outliers depends on sample size, expected heterozygosity, and other assumptions of the analyses.

## Reference

1. Charlesworth, B., Nordborg, M. & Charlesworth, D. The effects of local selection, balanced polymorphism and background selection on equilibrium patterns of genetic diversity in subdivided populations. *Genet. Res.* 70, 155-174 (1997).
